# Supplementary material for: Bifidobacterium Strains Present Distinct Effects on the Control of Alveolar Bone Loss in a Periodontitis Experimental Model
Source: PubMed Central journal article supplement (PMC8497694; doi:10.3389/fphar.2021.713595), 2021-09-24
Supplement: Table1.pdf [file Table1.pdf]

Table 1. Live innate immune cells (mean percentage  $\pm$  sd) according to expression of receptors in the gingival tissue of C57Bl/6 mice submitted to different treatments for 45 days. SHAM (negative control), P+B- (positive control), P-B+ (1101) (*B. breve* 110<sup>1A</sup>), P+B+ (1101) (microbial consortium + *B. breve* 110<sup>1A</sup>), P-B+ (1622) (*B. bifidum* 162<sup>2A</sup>) and P+B+ (1622) (microbial consortium + *B. bifidum* 162<sup>2A</sup>).

| GINGIVAL TISSUE IMMUNE CELLS                                                       | SHAM            | P+B-                        | P-B+(1101)                   | P+B+(1101)                      | P-B+(1622)                   | P+B+(1622)                    |
|------------------------------------------------------------------------------------|-----------------|-----------------------------|------------------------------|---------------------------------|------------------------------|-------------------------------|
| LIMPHOCYTES                                                                        | 10.8 $\pm$ 3.4  | 25.8 $\pm$ 10.3             | 39.6 $\pm$ 6.4 <sup>*#</sup> | 37.6 $\pm$ 9.3 <sup>*#</sup>    | 35.5 $\pm$ 5 <sup>*</sup>    | 54.4 $\pm$ 1 <sup>*#^</sup>   |
| CD45 <sup>+</sup>                                                                  | 25.4 $\pm$ 12.7 | 36.5 $\pm$ 5.8              | 64.5 $\pm$ 6.2 <sup>*#</sup> | 68.6 $\pm$ 13.5 <sup>*#</sup>   | 33.7 $\pm$ 11.5              | 54.3 $\pm$ 8.0 <sup>*#^</sup> |
| CD45 <sup>+</sup> CD3 <sup>+</sup>                                                 | 8.5 $\pm$ 0.1   | 8.49 $\pm$ 2.01             | 9.0 $\pm$ 1.2                | 10.9 $\pm$ 0.4                  | 11.6 $\pm$ 1.3               | 16.8 $\pm$ 0                  |
| CD45 <sup>+</sup> CD3 <sup>+</sup> CD4 <sup>+</sup>                                | 47.5 $\pm$ 6.6  | 43.7 $\pm$ 5.6              | 32.3 $\pm$ 0.9               | 41.8 $\pm$ 4.5 <sup>*#</sup>    | 68.1 $\pm$ 5.4               | 52.7 $\pm$ 1.5                |
| CD45 <sup>+</sup> CD3 <sup>+</sup> CD4 <sup>-</sup><br>ROR $\gamma$ t <sup>+</sup> | 0.4 $\pm$ 0.4   | 0.4 $\pm$ 0.3               | 9.2 $\pm$ 4.3                | 10.2 $\pm$ 0.0                  | 0.02 $\pm$ 0.0               | 0.1 $\pm$ 0.03                |
| CD45 <sup>+</sup> CD3 <sup>+</sup> CD4 <sup>+</sup><br>ROR $\gamma$ t <sup>+</sup> | 0.3 $\pm$ 0.3   | 0.1 $\pm$ 0.1               | 3 $\pm$ 1.9                  | 1.7 $\pm$ 0.05                  | 0.5 $\pm$ 0.2                | 0.6 $\pm$ 0.02                |
| CD45 <sup>+</sup> CD3 <sup>+</sup> CD4 <sup>+</sup><br>ROR $\gamma$ t <sup>-</sup> | 45.7 $\pm$ 6.6  | 41.4 $\pm$ 5.7              | 34.1 $\pm$ 4.8               | 41.7 $\pm$ 3.5                  | 68.3 $\pm$ 5 <sup>*#</sup>   | 55 $\pm$ 1.6                  |
| CD45 <sup>+</sup> CD3 <sup>+</sup> CD4 <sup>-</sup><br>ROR $\gamma$ t <sup>-</sup> | 53.4 $\pm$ 7.4  | 57.9 $\pm$ 5.2 <sup>*</sup> | 53.6 $\pm$ 1.4               | 46.2 $\pm$ 3.4 <sup>&amp;</sup> | 31.1 $\pm$ 4.7 <sup>*#</sup> | 44.2 $\pm$ 4.1 <sup>*#^</sup> |
| CD45 <sup>+</sup> CD3 <sup>+</sup> CD4 <sup>-</sup><br>FOXP3 <sup>+</sup>          | 0.5 $\pm$ 0.2   | 0.9 $\pm$ 0.7               | 6.2 $\pm$ 3.3                | 3.7 $\pm$ 1.0                   | 0.7 $\pm$ 0.2                | 2.27 $\pm$ 0.41               |
| CD45 <sup>+</sup> CD3 <sup>+</sup> CD4 <sup>+</sup><br>FOXP3 <sup>+</sup>          | 3.2 $\pm$ 0.2   | 2.5 $\pm$ 0.04              | 4.8 $\pm$ 2.5                | 4.7 $\pm$ 1.0                   | 3.8 $\pm$ 1.1                | 6.1 $\pm$ 2.3                 |
| CD45 <sup>+</sup> CD3 <sup>+</sup> CD4 <sup>+</sup><br>FOXP3 <sup>-</sup>          | 42.9 $\pm$ 7.2  | 39.0 $\pm$ 5.6              | 28.5 $\pm$ 3.4               | 37.6 $\pm$ 3.1                  | 56.8 $\pm$ 7.5 <sup>#</sup>  | 37.9 $\pm$ 3.8 <sup>^</sup>   |
| CD45 <sup>+</sup> CD3 <sup>+</sup> CD4 <sup>-</sup><br>FOXP3 <sup>-</sup>          | 53.3 $\pm$ 6.6  | 57.4 $\pm$ 4.9              | 60.4 $\pm$ 2.5               | 53.9 $\pm$ 3.1                  | 38.5 $\pm$ 6.1 <sup>#</sup>  | 53.6 $\pm$ 1.1                |

\* Statistically significant difference in relation to negative control, # Statistically significant difference in relation to positive control P+B-, & Statistically significant difference in relation to the group P-B+ (1101), ^ Statistically significant difference in relation to the group P-B+ (1622). ANOVA, Tukey's multiple comparison, p <0.05%.
